# Supplementary figures and images for: Ablation of SMUG1 Reduces Cell Viability and Increases UVC-Mediated Apoptosis in Hepatocarcinoma HepG2 Cells
Source: MDPI journal article supplement (doi:10.3390/genes12020201), 2021-01-30

# Supplementary Figure 1

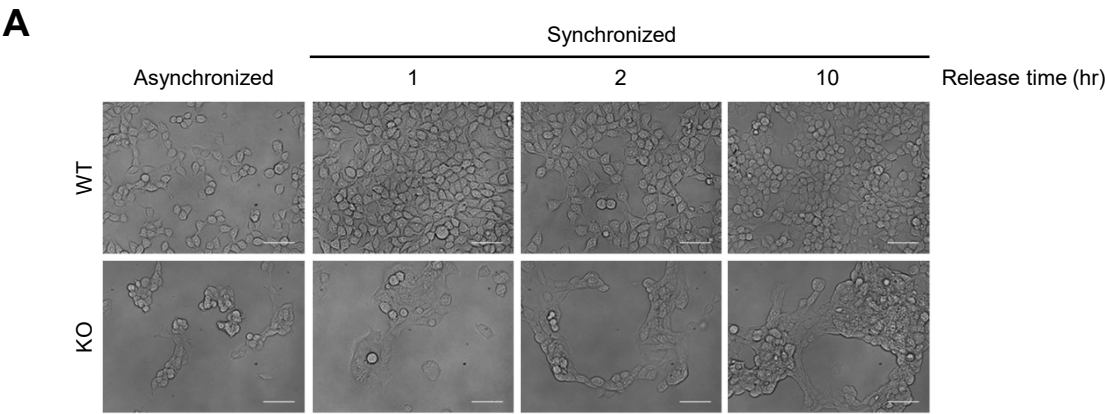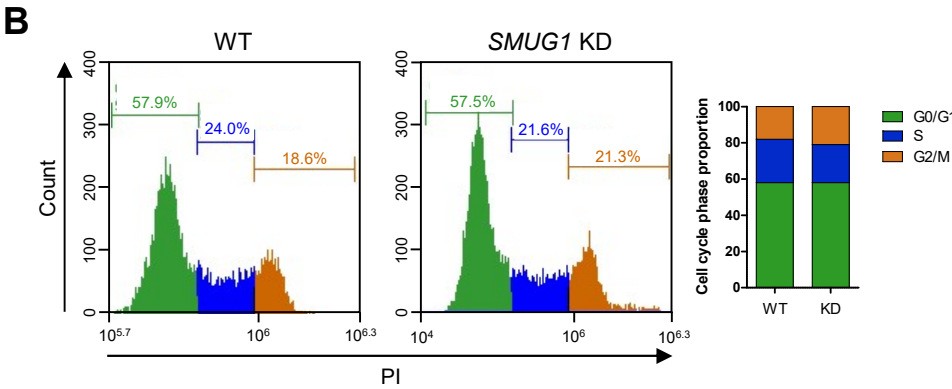

Supplement: s1 [file s1]
